# Supplementary material for: Predictive Values of Preoperative Characteristics for 30-Day Mortality in Traumatic Hip Fracture Patients
Source: MDPI journal article supplement (doi:10.3390/jpm11050353), 2021-04-28
Supplement: s1 [file s1]

## Supplementary materials

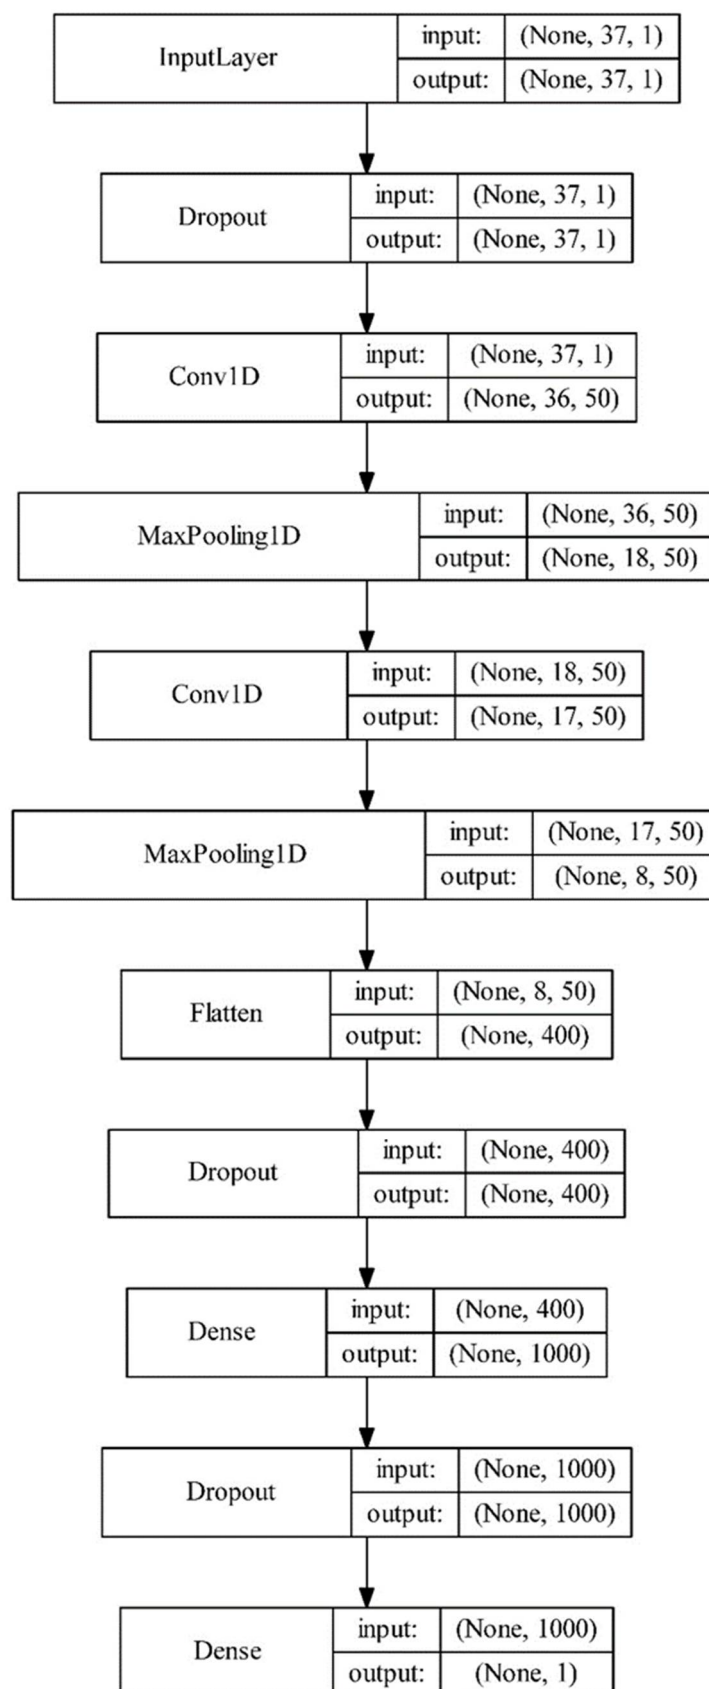

**Figure S1.** Structure of the convolutional neural network.

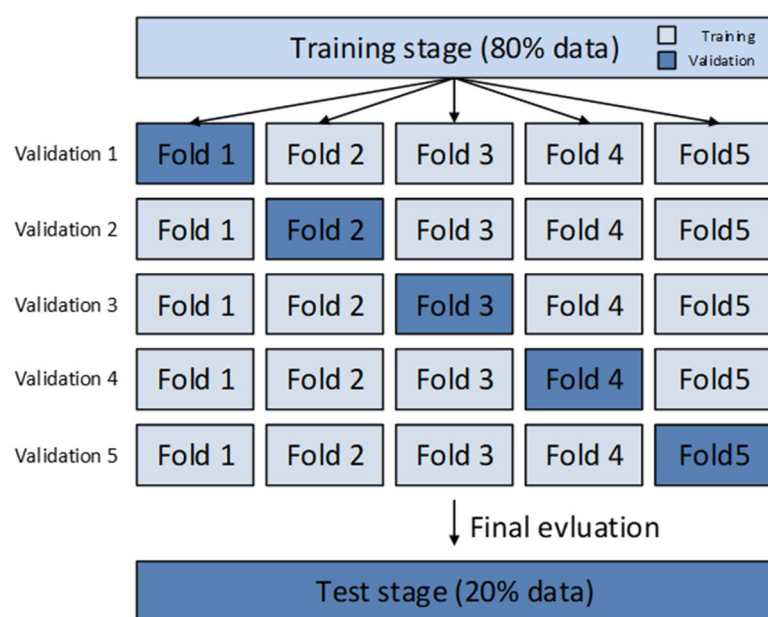

**Figure S2.** Training and test of the machine learning models.

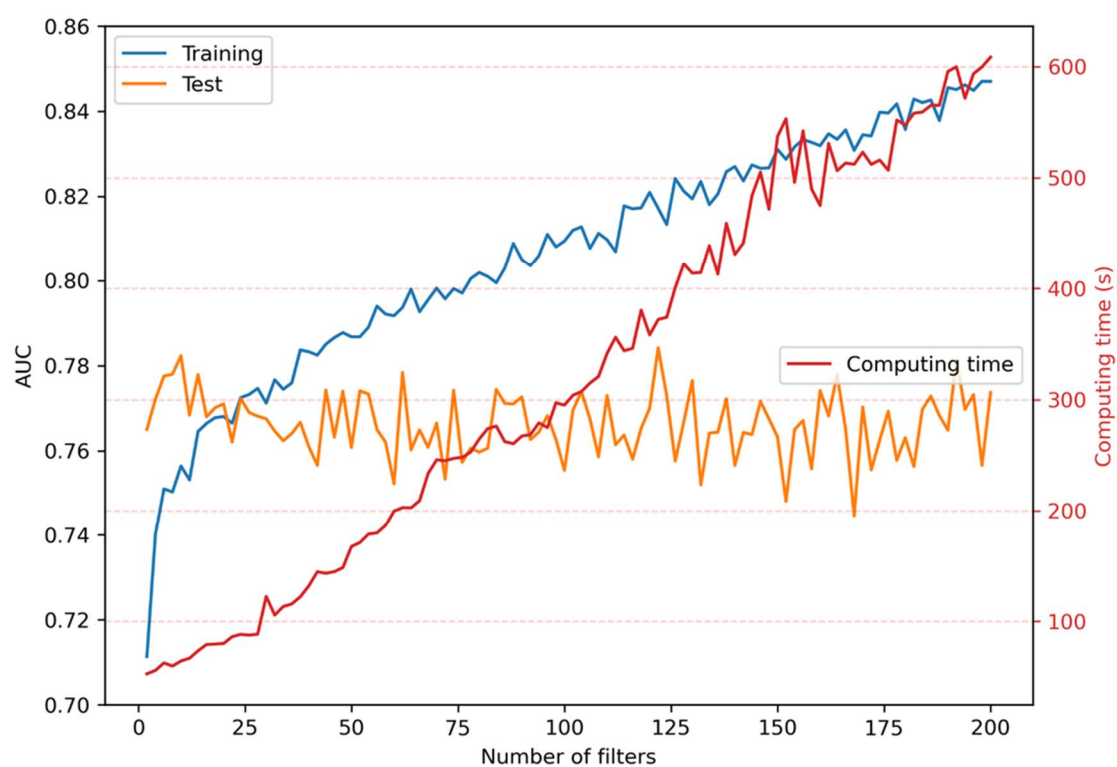

**Figure S3.** Performance of the CNN model with different number of filters.

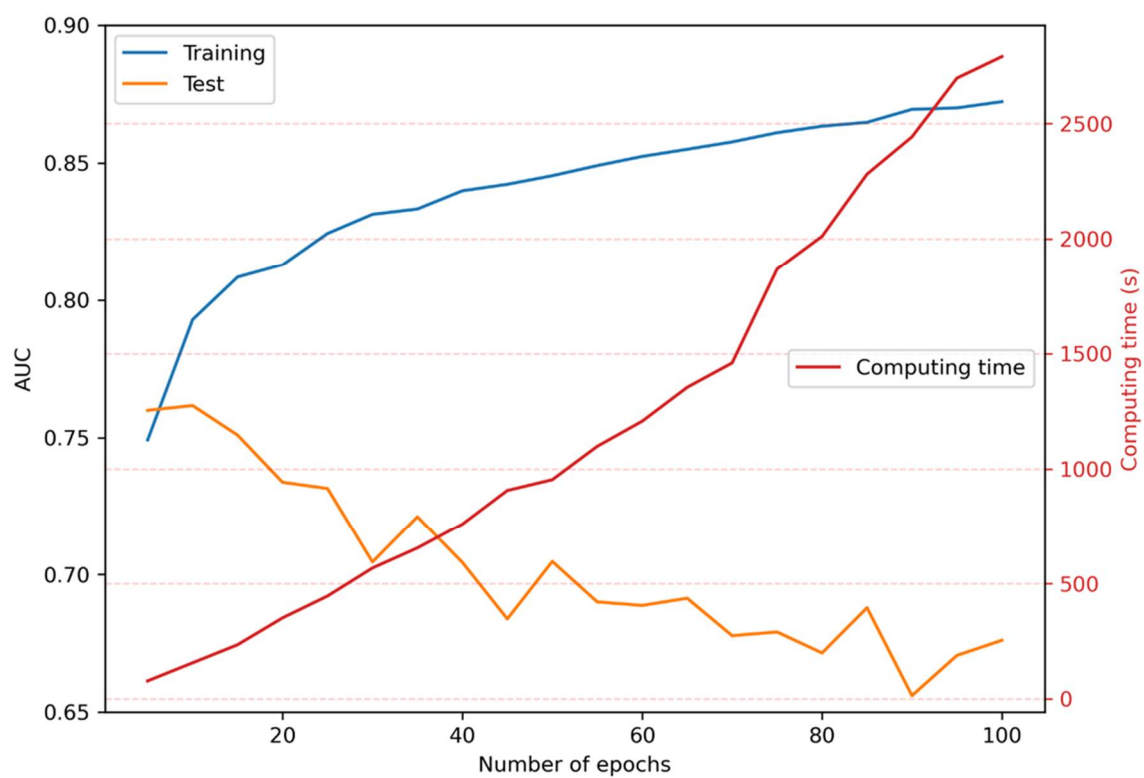

**Figure S4.** Performance of the CNN model with different number of epochs.

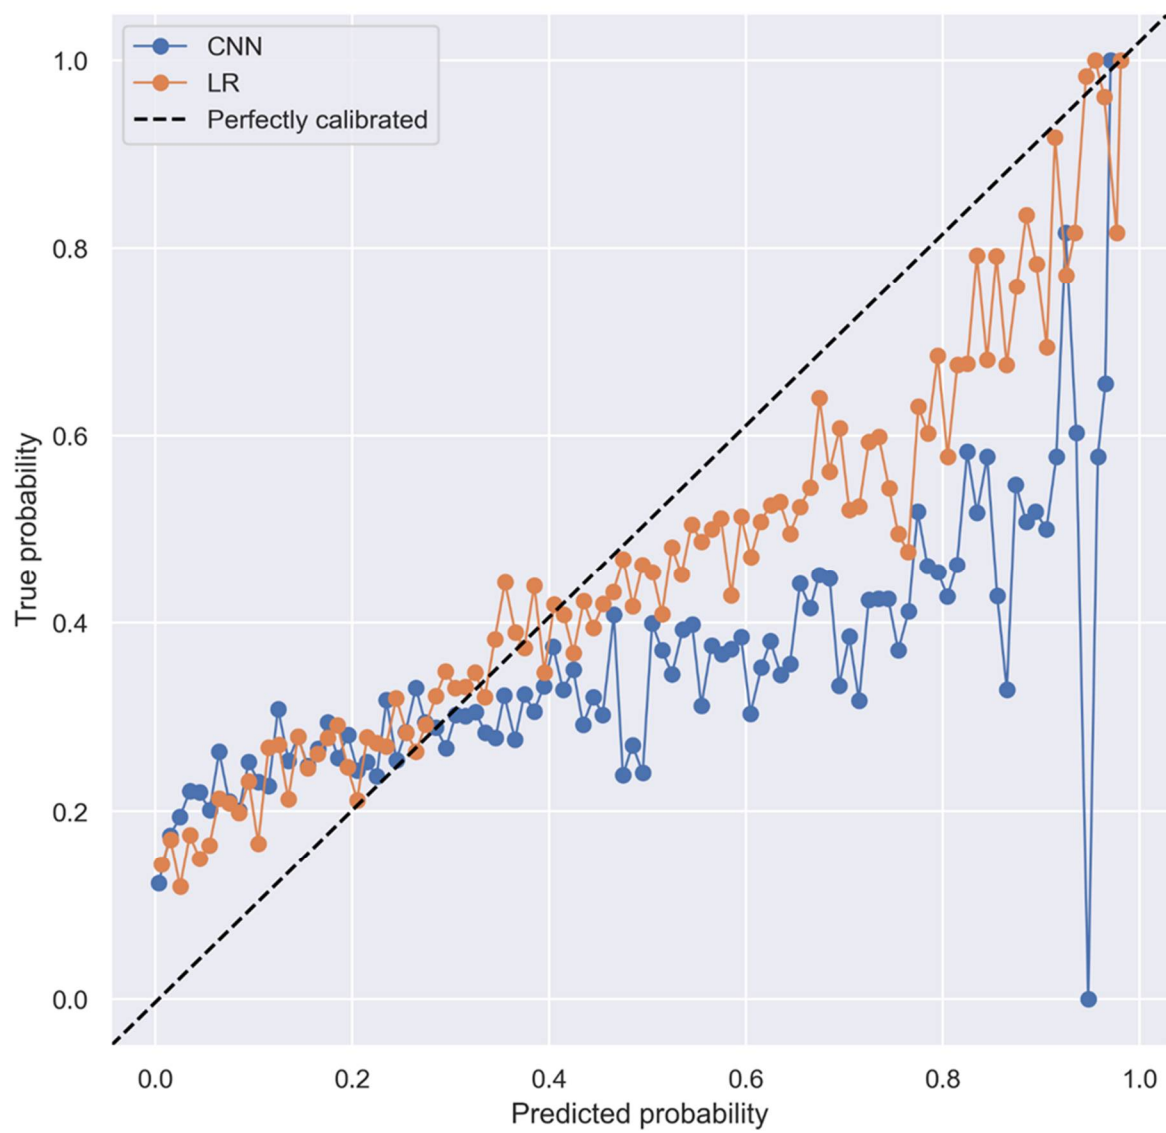

**Figure S5.** Calibration curve of the CNN and LR models on the test dataset.
